# Supplementary material for: Indirect Genetic Effects of ADIPOQ Variants on Lipid Levels in a Sibling Study of a Rural Chinese Population
Source: MDPI journal article supplement (doi:10.3390/genes13010161), 2022-01-17
Supplement: s1 [file s1]

**Table S1.** SNPs selected for the study.

| SNP        | Position     | Max | Min | Missing rate | MAF   | P for HWE |
|------------|--------------|-----|-----|--------------|-------|-----------|
| rs16861194 | 3: 186841636 | A   | G   | 0            | 0.172 | 0.033     |
| rs266729   | 3: 186841685 | C   | G   | 0            | 0.283 | 0.268     |
| rs182052   | 3: 186842993 | A   | G   | 0            | 0.482 | 0.152     |

**Table S2.** Phenotypic correlations between sibling pairs.

| Variables | r     | P      |
|-----------|-------|--------|
| BMI       | 0.218 | <0.001 |
| WC        | 0.218 | <0.001 |
| SBP       | 0.201 | <0.001 |
| DBP       | 0.249 | <0.001 |
| FBG       | 0.224 | <0.001 |
| TG        | 0.200 | <0.001 |
| TC        | 0.620 | <0.001 |
| HDL-C     | 0.670 | <0.001 |
| LDL-C     | 0.553 | <0.001 |

**Table S3.** Phenotypic correlations between sibling pairs stratified by sex.

| Variables | Same-sex siblings |        | Opposite-sex siblings |        |
|-----------|-------------------|--------|-----------------------|--------|
|           | r                 | P      | r                     | P      |
| TG        | 0.226             | <0.001 | 0.158                 | <0.001 |
| TC        | 0.625             | <0.001 | 0.611                 | <0.001 |
| HDL-C     | 0.655             | <0.001 | 0.697                 | <0.001 |
| LDL-C     | 0.559             | <0.001 | 0.544                 | <0.001 |

**Table S4.** Phenotypic correlations between sibling pairs stratified by genotype and sex.

| Sex                   | Variables | AA/AG-genotype siblings |        | GG genotype siblings |        | Opposite-genotype siblings |        |
|-----------------------|-----------|-------------------------|--------|----------------------|--------|----------------------------|--------|
|                       |           | r                       | P      | r                    | P      | r                          | P      |
| All                   | TG        | 0.161                   | <0.001 | 0.365                | <0.001 | 0.244                      | <0.001 |
|                       | TC        | 0.607                   | <0.001 | 0.661                | <0.001 | 0.628                      | <0.001 |
|                       | HDL-C     | 0.686                   | <0.001 | 0.624                | <0.001 | 0.660                      | <0.001 |
|                       | LDL-C     | 0.541                   | <0.001 | 0.601                | <0.001 | 0.551                      | <0.001 |
| Same-sex siblings     | TG        | 0.184                   | <0.001 | 0.412                | <0.001 | 0.275                      | <0.001 |
|                       | TC        | 0.624                   | <0.001 | 0.654                | <0.001 | 0.613                      | <0.001 |
|                       | HDL-C     | 0.687                   | <0.001 | 0.581                | <0.001 | 0.625                      | <0.001 |
|                       | LDL-C     | 0.555                   | <0.001 | 0.578                | <0.001 | 0.564                      | <0.001 |
| Opposite-sex siblings | TG        | 0.125                   | 0.011  | 0.292                | 0.011  | 0.200                      | 0.012  |
|                       | TC        | 0.578                   | <0.001 | 0.671                | <0.001 | 0.653                      | <0.001 |
|                       | HDL-C     | 0.683                   | <0.001 | 0.713                | <0.001 | 0.713                      | <0.001 |
|                       | LDL-C     | 0.518                   | <0.001 | 0.630                | <0.001 | 0.539                      | <0.001 |
